# Supplementary material
Source: PubMed Central journal article supplement (PMC5854509)
Supplement: NIHMS908834-supplement-1.pdf [file NIHMS908834-supplement-1.pdf]

## **Supplementary Materials and Methods.**

### **Generation of CRISPR-Cas9 driven LPAR1 knock out in astrocytes.**

sgRNA targeting LPAR1 were designed using Broad institute web tool: <https://portals.broadinstitute.org/gpp/public/analysis-tools/sgrna-design>; synthesized as separate oligo nucleotides and cloned into pLentiCRISPR v2 (1) (a gift from Feng Zhang (Addgene plasmid # 52961)). Lentiviral particles were produced as previously described (2). Immortalized astrocytes were infected and selected on 1 µg/ml of puromycin until stable clones were formed. Individual clones were established and tested for LPAR1 expression.

1. Sanjana NE, Shalem O, Zhang F. Improved vectors and genome-wide libraries for CRISPR screening. *Nature methods*. 2014;11(8):783-4.
2. Pugacheva EN, Jablonski SA, Hartman TR, Henske EP, Golemis EA. HEF1-dependent Aurora A activation induces disassembly of the primary cilium. *Cell*. 2007;129(7):1351-63.

**A**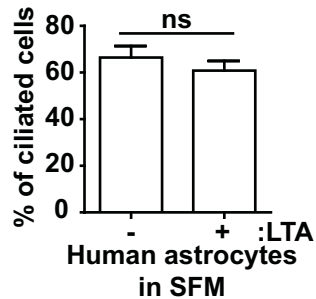**B**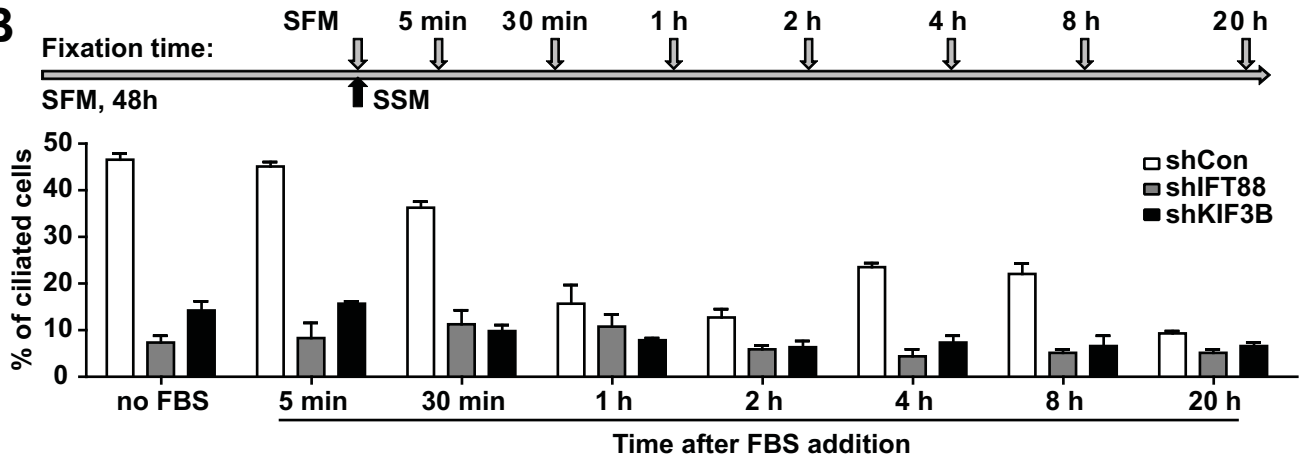

**Primary cilia formation in human astrocytes and astrocytes immortalized with large T antigen.**

**A.** Quantification of primary cilia in human astrocytes and human astrocytes immortalized with large T antigen (LTA) in serum-free media (SFM) as in **Fig.1 A-B**; two-tailed Student's *t*-test,  $n=3$ , 100 cells per experiment. **B.** Quantification of primary cilia over time in HA-LTA constitutively expressing shCon, shIFT88 or shKIF3B, pre-incubated for 48h with serum-free media (SFM) and stimulated with serum-supplemented media (SSM); experimental design on top,  $n = 3$ , per time point.

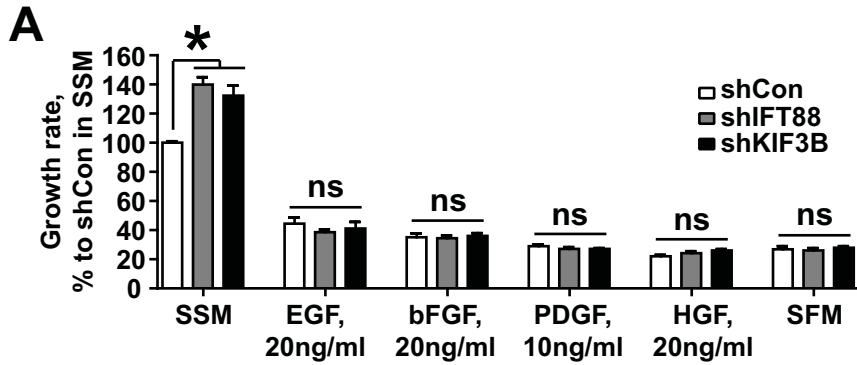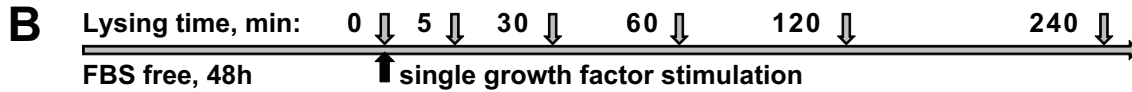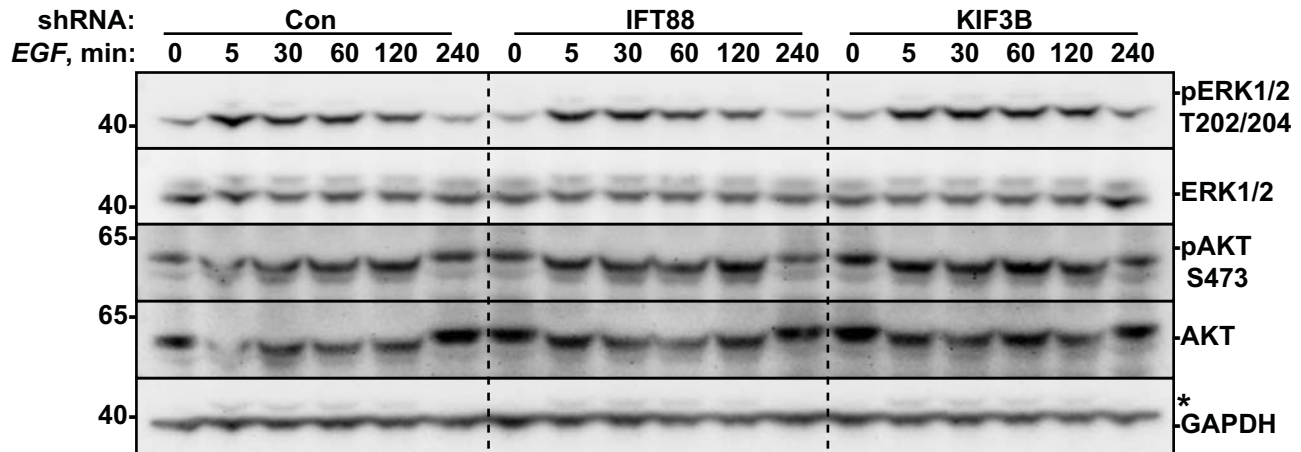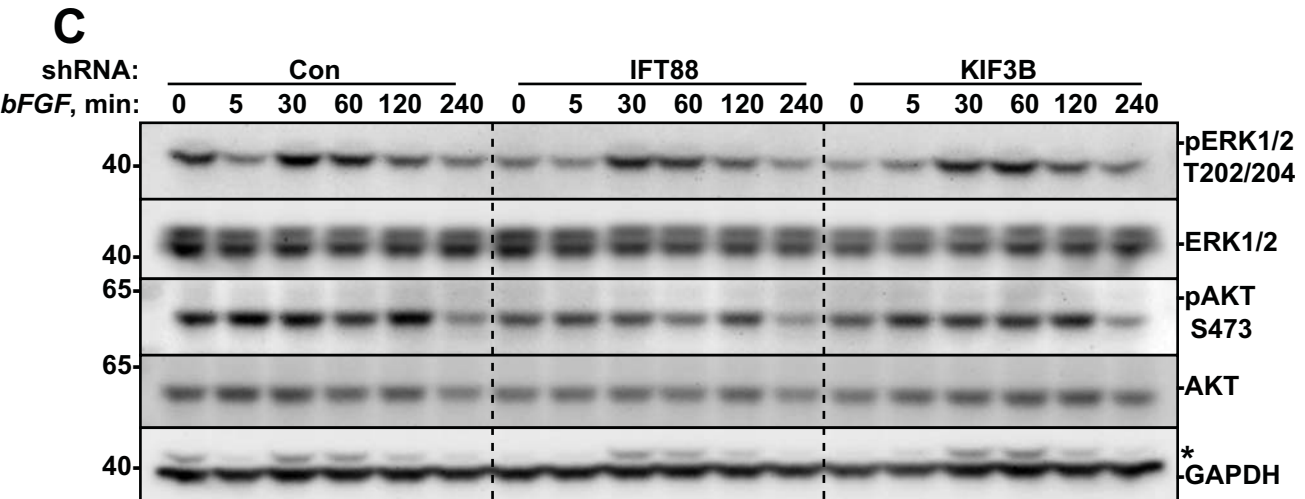

**Proliferation and ERK1/2 and AKT phosphorylation in response to single growth factor stimulation of HA-LTA.**

**A.** Growth rate of HA-LTA with intact (shCon) or impaired (shIFT88, shKIF3B) ciliogenesis in serum-supplemented media (SSM), serum-free media (SFM) or SFM supplemented with indicated single growth factors. One-way ANOVA with Dunnett's post hoc test, \* $p < 0.05$ ;  $n = 3$ . **B, C.** Representative western blot of response to single growth factor stimulation for cells as in **A**. Experimental set up shown in top **B**: serum-starved cells were treated with 20ng/ml of EGF (bottom **B**), 20ng/ml of bFGF (**C**), lysed in time-dependent manner; and stained with antibodies against Thr202/Tyr204 phosphorylated ERK1/2 (pERK1/2 T202/204), total ERK1/2, Ser473 phosphorylated AKT (pAKT S473), total AKT and GAPDH, as a loading control. \* indicates bleed-through of pERK1/2 signal.

**A**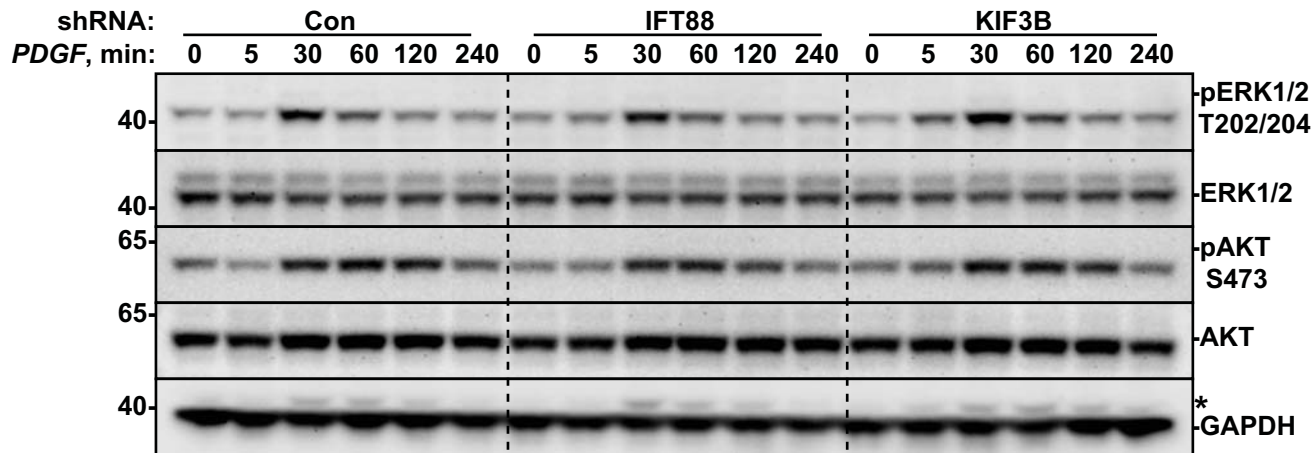**B**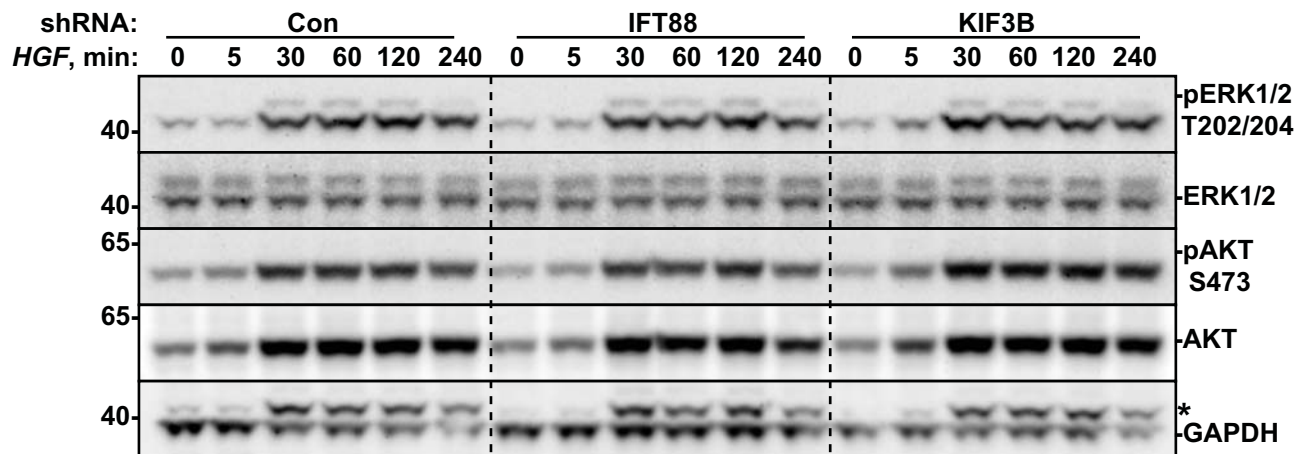

**Proliferation and ERK1/2 and AKT phosphorylation in response to single growth factor stimulation of HA-LTA.**

**A, B.** Representative western blot of response to single growth factor stimulation for cells as in **Fig.S2A**. Experimental set up shown in top **Fig.S2B**: serum-starved cells were treated with 10ng/ml of PDGF-AB (**A**), or 20ng/ml of HGF (**B**), lysed in time-dependent manner; and stained with antibodies against Thr202/Tyr204 phosphorylated ERK1/2 (pERK1/2 T202/204), total ERK1/2, Ser473 phosphorylated AKT (pAKT S473), total AKT and GAPDH, as a loading control. \* indicates bleed-through of pERK1/2 signal.

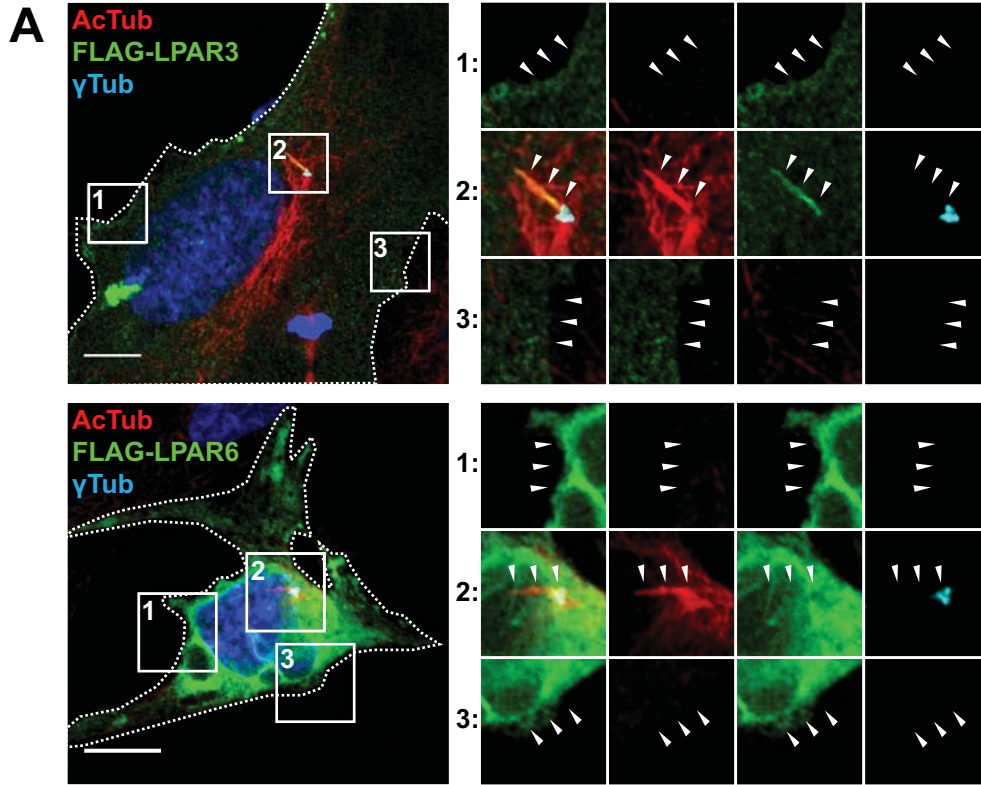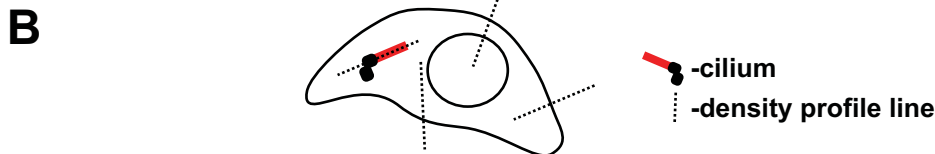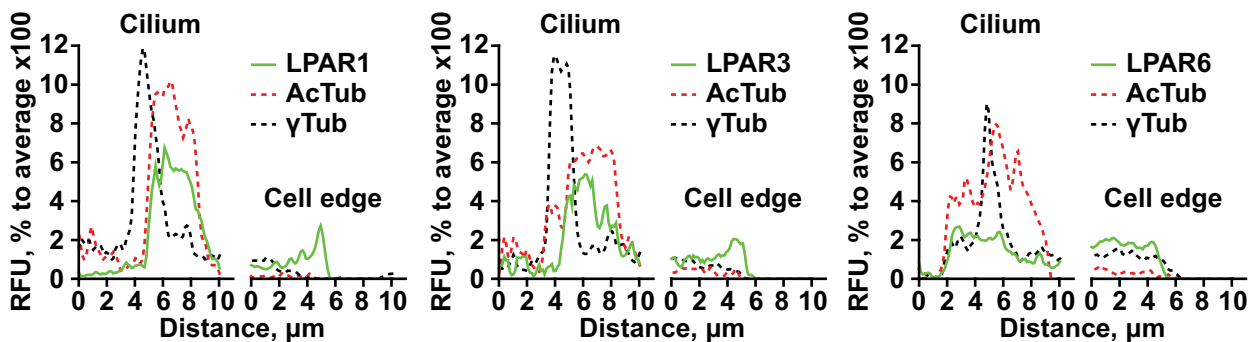

**LPAR1, 3 and 6 subcellular localization in cells with assembled primary cilium.**

**A.** Representative images of cells with primary cilia expressing 3xFLAG LPAR3 and LPAR6, stained for FLAG-tag, acetylated  $\alpha$ -tubulin (AcTub, cilia marker) and  $\gamma$ -tubulin ( $\gamma$ Tub, centriole/basal body marker). Scale bar - 10 $\mu\text{m}$ . **B.** Signal intensity profile of the primary cilium and cell edge regions of cell in **A** and **Fig.5A**, as shown in pictogram on top.

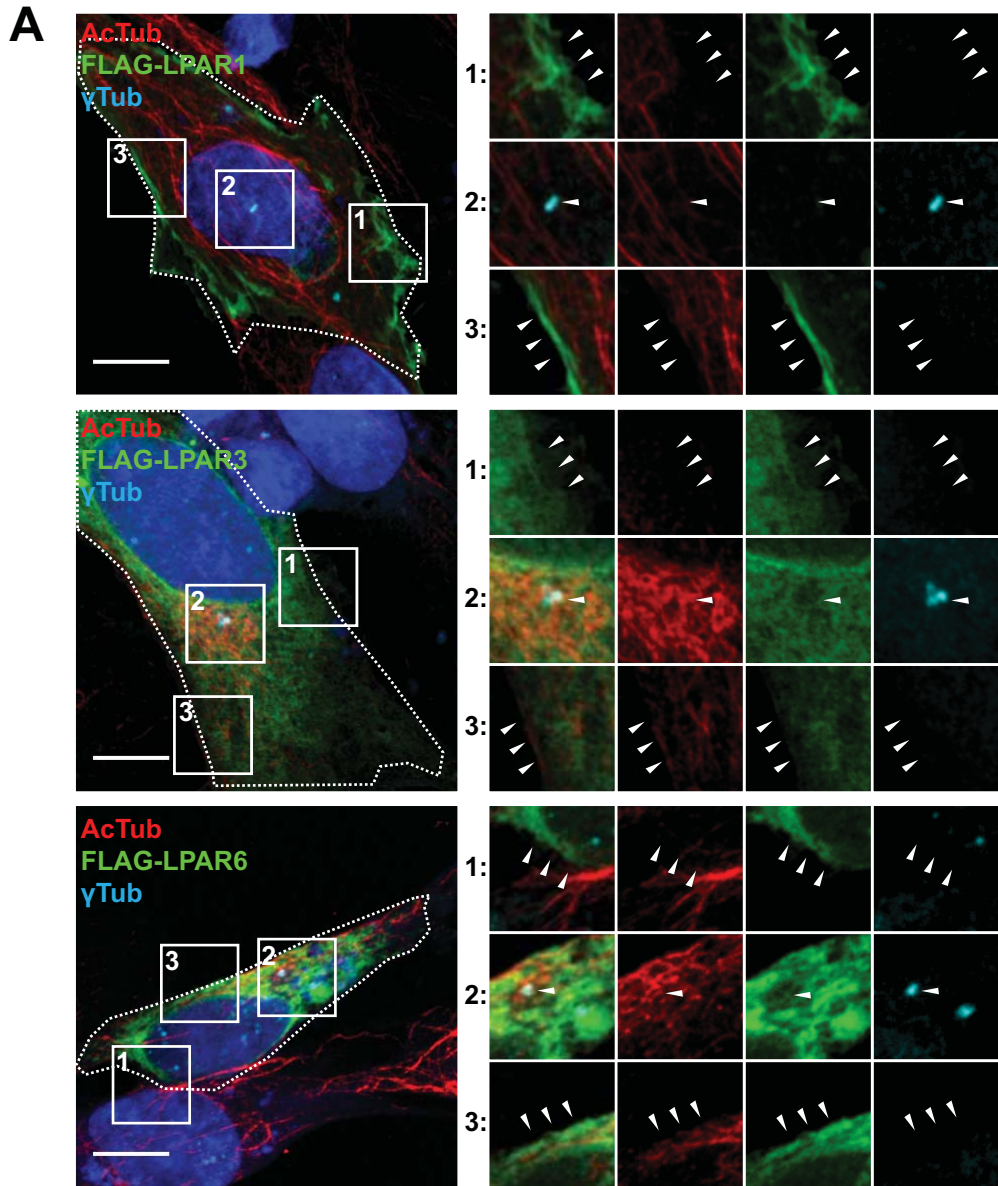

**B**

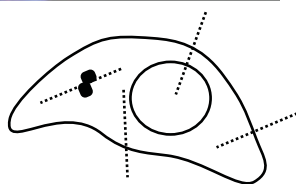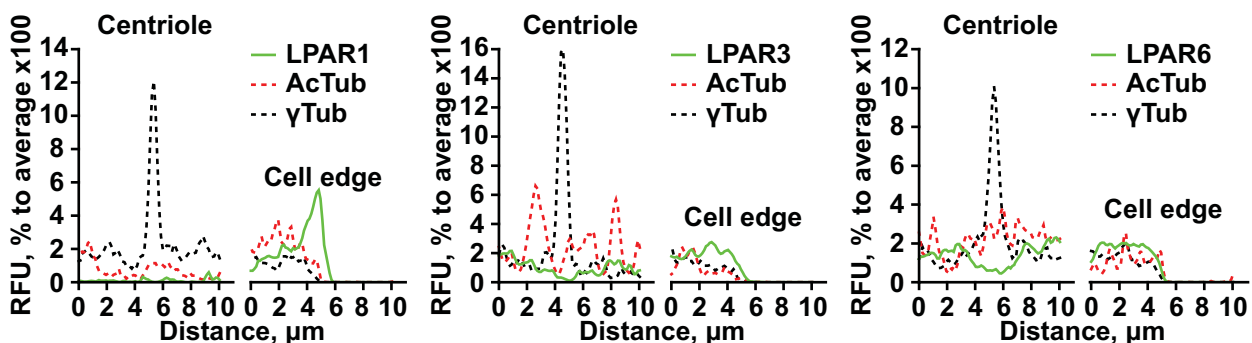

**LPAR1, 3 and 6 subcellular localization in cells with disassembled primary cilium.**

**A.** Representative images of cells w/o primary cilia expressing 3xFLAG tagged LPAR1, LPAR3 and LPAR6, stained for FLAG-tag, acetylated  $\alpha$ -tubulin (AcTub, cilia marker) and  $\gamma$ -tubulin ( $\gamma$ Tub, centriole/basal body marker). Scale bar - 10 $\mu\text{m}$ . **B.** Signal intensity profile of the centriole and cell edge regions of cell in **A**, as shown in pictogram on top.

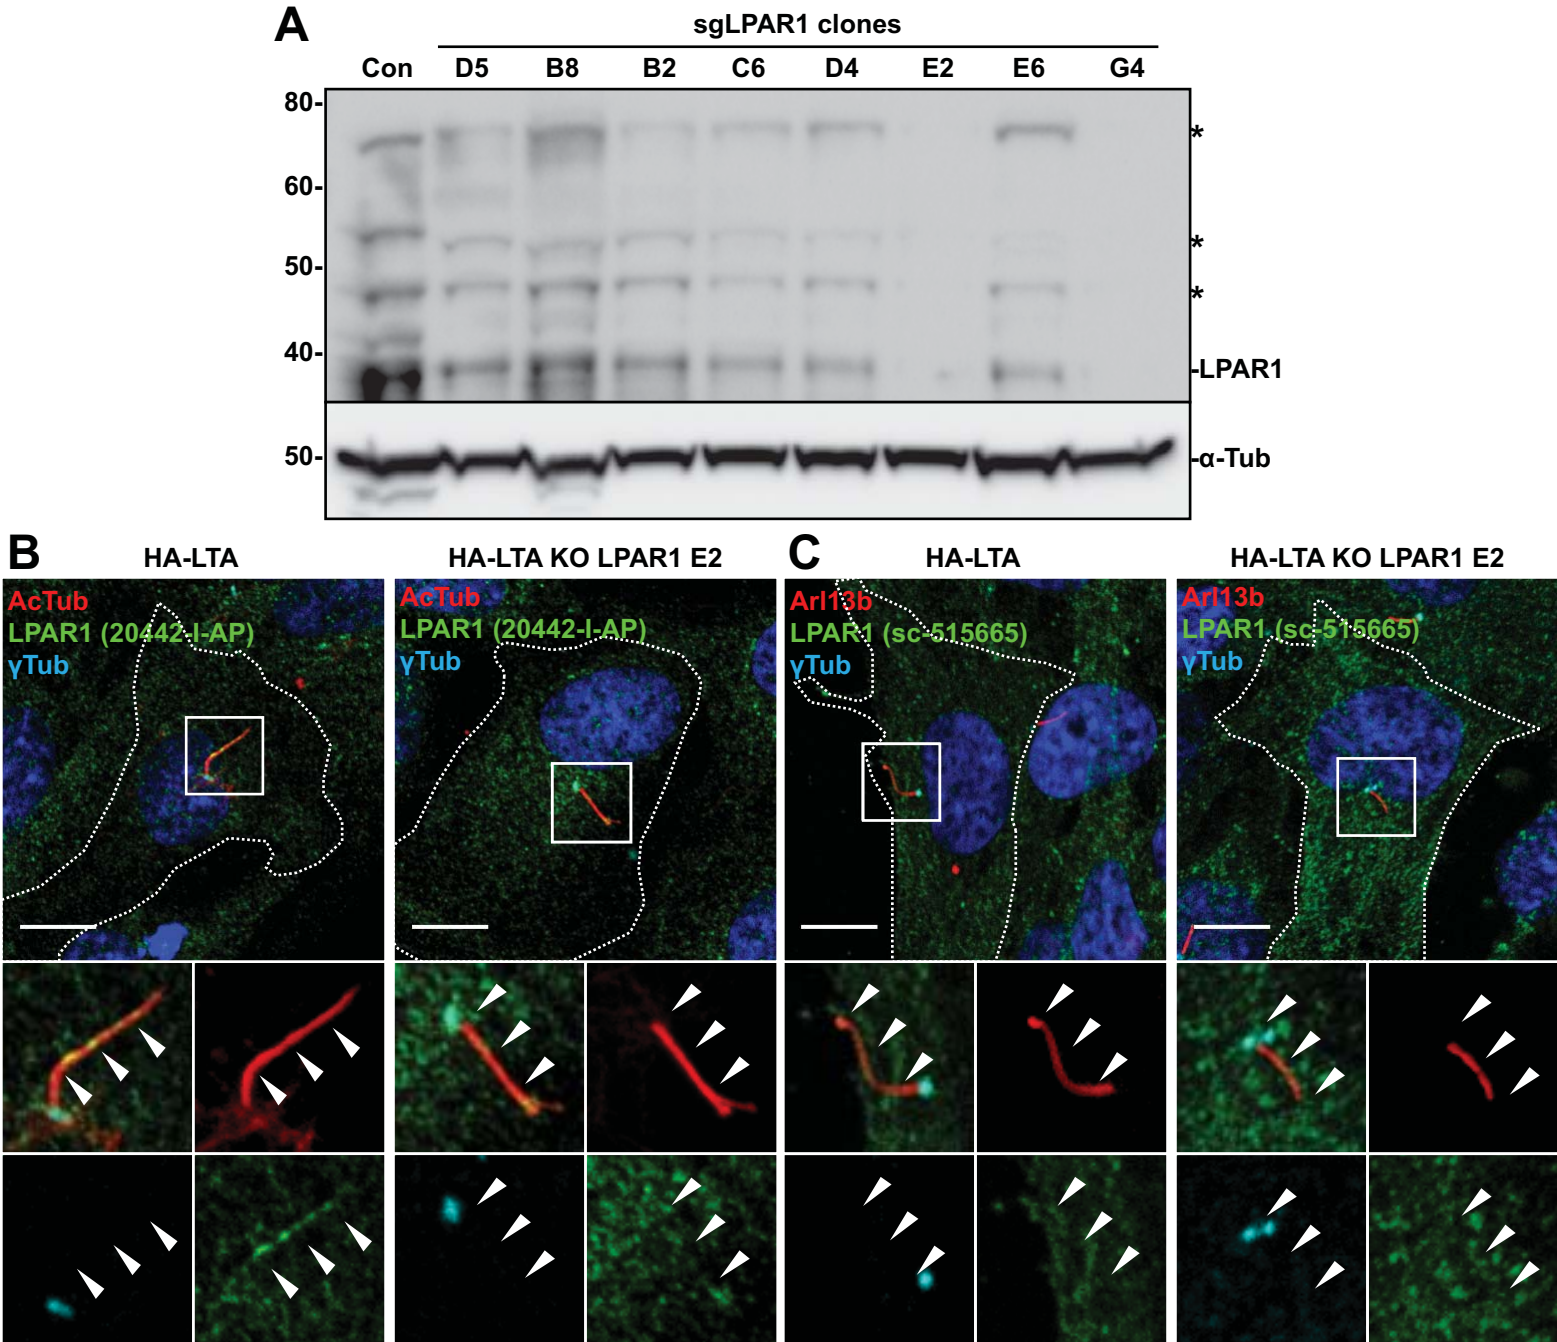

**LPAR1 antibodies validation for immunofluorescent staining.**

**A.** Western blot of CRISPR-Cas9 induced knockout of LPAR1 in immortalized astrocytes (HA-LTA) stably expressing sgRNA (Con) or sgRNA against LPAR1. \* indicates glycosylated forms of LPAR1. **B-C.** Representative image of HA-LTA, stained for acetylated  $\alpha$ -tubulin (AcTub, cilium marker; B) or Arl13b (cilium marker; C),  $\gamma$ -tubulin ( $\gamma$ Tub, basal body marker) and LPAR1 (B - Proteintech 20442-I-AP, C - SantaCruz sc-515665); scale bar – 10 $\mu$ m.

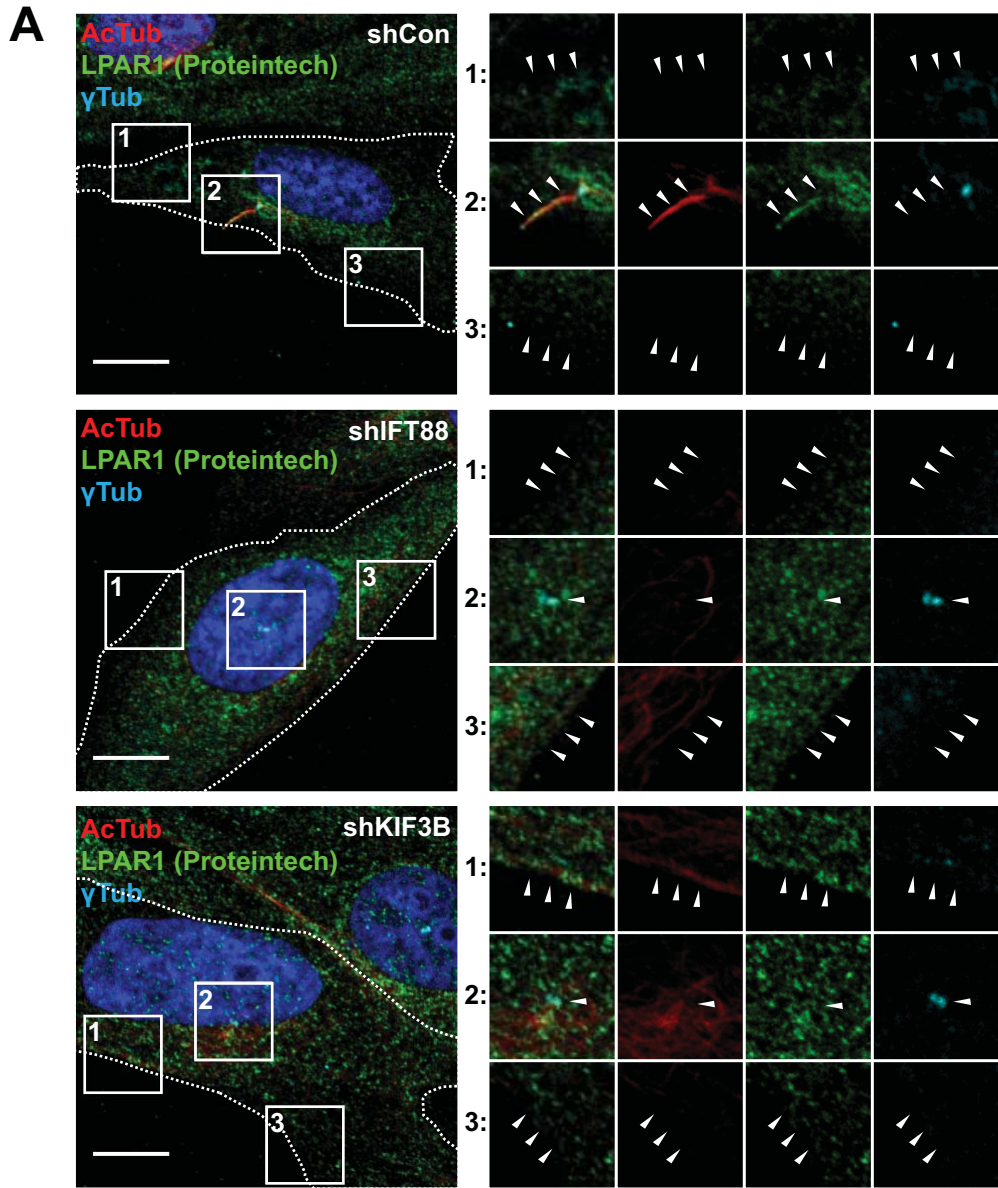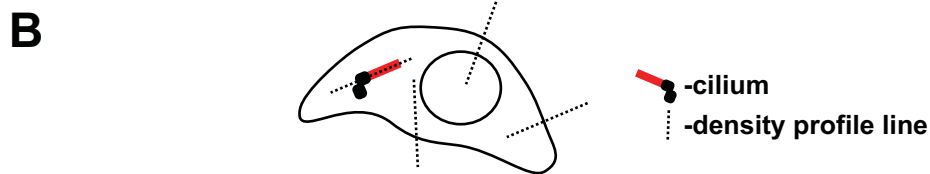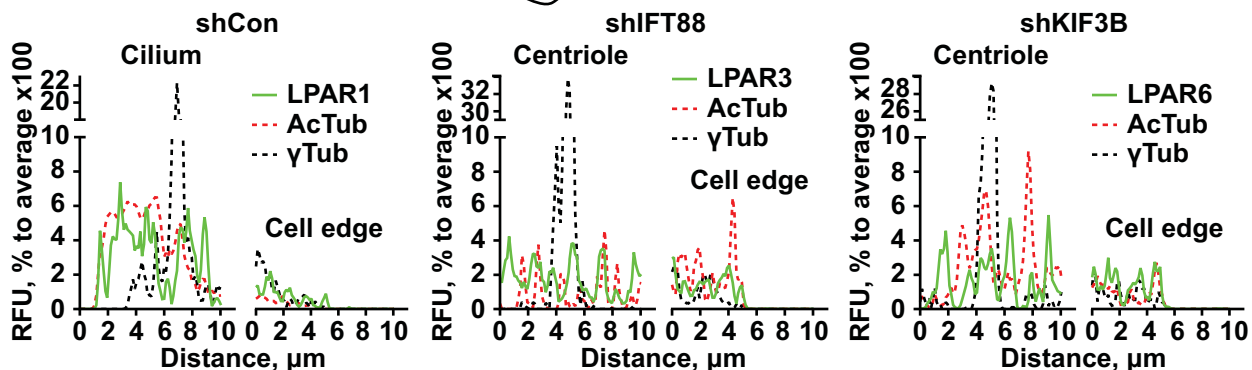

**Endogenous LPAR1 localization in cells with and without primary cilium.**

**A.** Representative images of HA-LTA with intact (shCon) or impaired (shIFT88, shKIF3B), stained for LPAR1, acetylated  $\alpha$ -tubulin (AcTub, cilia marker) and  $\gamma$ -tubulin ( $\gamma\text{Tub}$ , centriole/basal body marker). Scale bar - 10 $\mu\text{m}$ . **B.** Signal intensity profile of the cilium/centriole and cell edge regions of cells in **A**, as shown in pictogram on top.



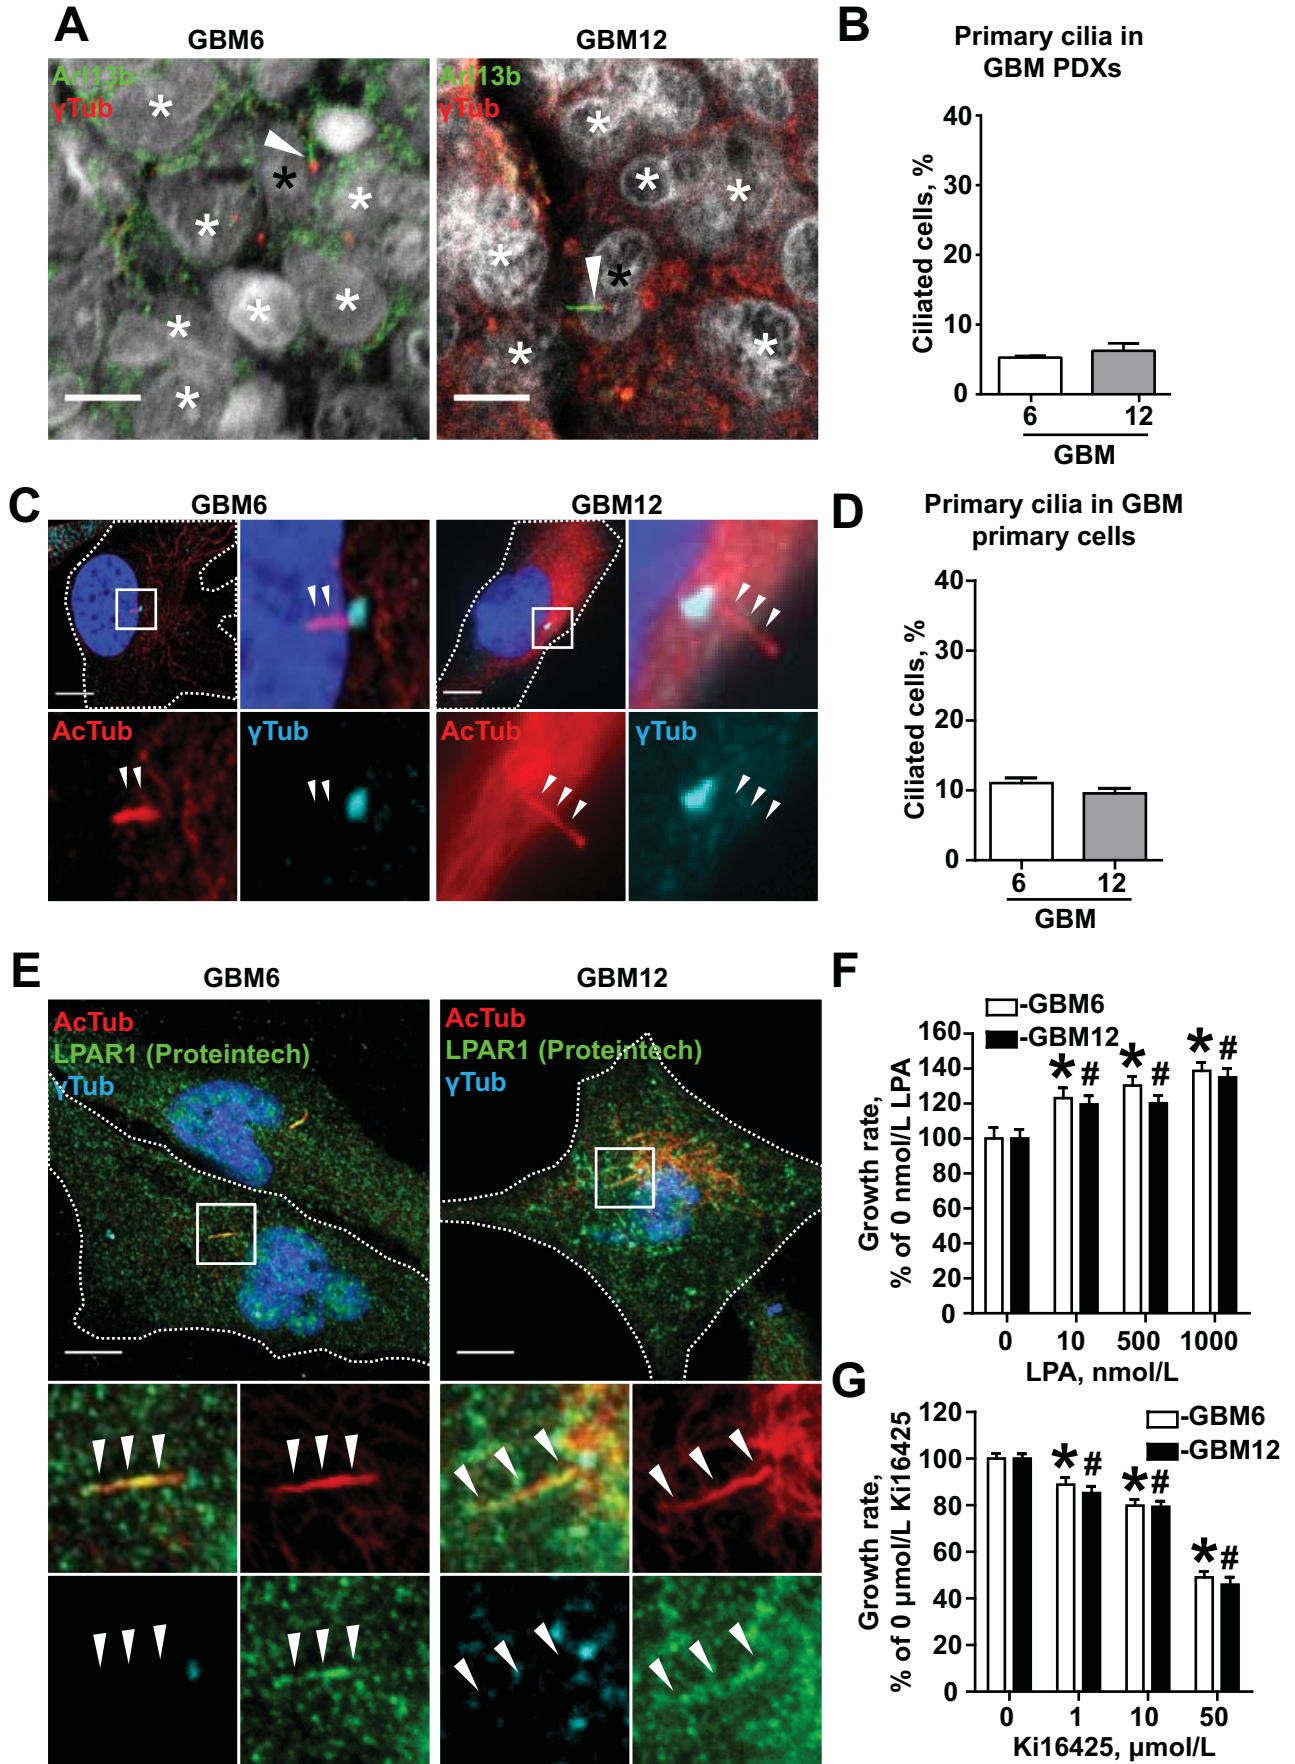

**GBM6 and GBM12 have decreased ciliation and utilize LPA as a growth factor.**

**A.** Representative images of GBM6 and GBM12 PDXs stained for Arl13b (marker of cilia) and  $\gamma$ -tubulin ( $\gamma$ Tub, marker of centriole/basal body). Arrows indicate primary cilia, black asterisks - ciliated cells, white asterisks - deciliated cells. Scale bar - 10 $\mu$ m. **B.** Quantification of primary cilia occurrence in GBM6 and GBM12 xenografts as in **A**; n=3, 100 cells per group. **C.** Representative images of GBM6 and GBM12 cultured primary cells stained for acetylated  $\alpha$ -tubulin (AcTub, marker of cilia) and  $\gamma$ -tubulin ( $\gamma$ Tub, marker of centriole/basal body). Arrows indicate primary cilia. Scale bar - 10 $\mu$ m. **D.** Quantification of primary cilia occurrence in GBM6 and GBM12 primary cells, as in **C**; n=3, 100 cells per group. **E.** Representative images of GBM6 and GBM12 cultured primary cells stained for acetylated  $\alpha$ -tubulin (AcTub, marker of cilia), LPAR1 and  $\gamma$ -tubulin ( $\gamma$ Tub, marker of centriole/basal body). Arrows indicate primary cilia. Scale bar - 10 $\mu$ m. **F.** Growth rate of GBM6 and GBM12 primary cells in serum-free media supplemented with 20ng/ml of EGF, 20ng/ml of bFGF, B27 supplement and indicated concentrations of LPA. One-way ANOVA with Dunnett's post hoc test; \*, #*p*<0.05 for GBM6 and GBM12 respectively, compared to no LPA control; n=3. **G.** Growth rate of GBM6 and GBM12 primary cells in 2% serum-supplemented media and in presence of indicated concentrations of Ki16425. One-way ANOVA with Dunnett's post hoc test; \*, #*p*<0.05 for GBM6 and GBM12 respectively, compared to no Ki16425 control; n=3.

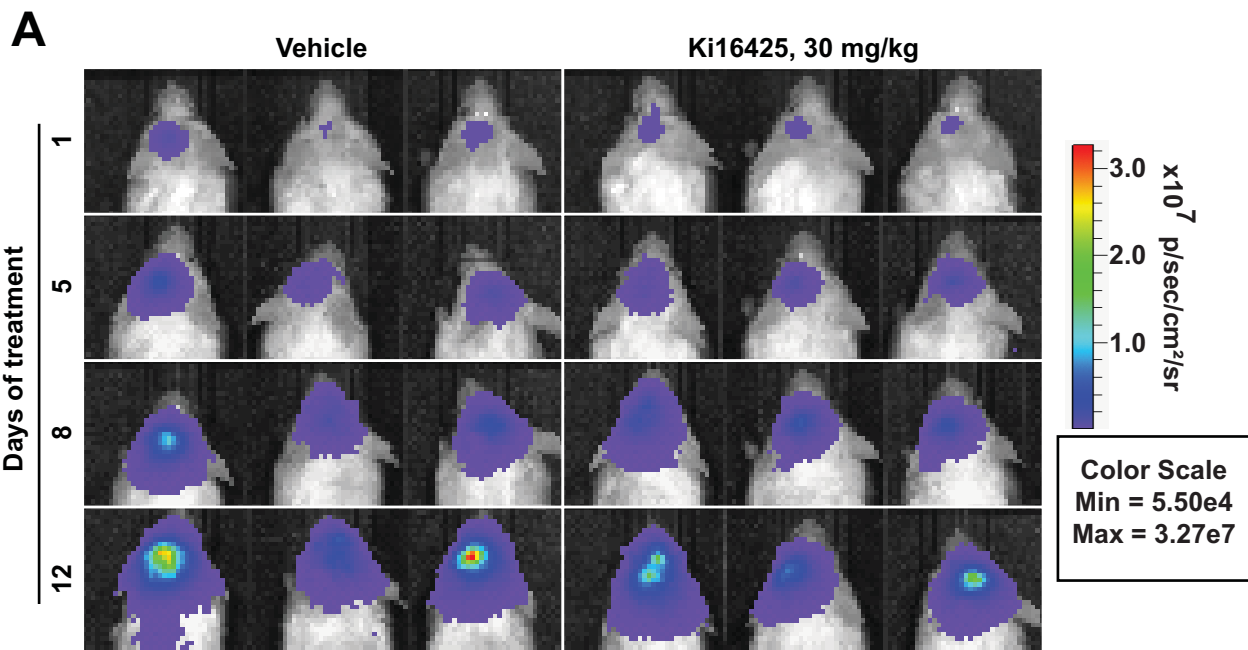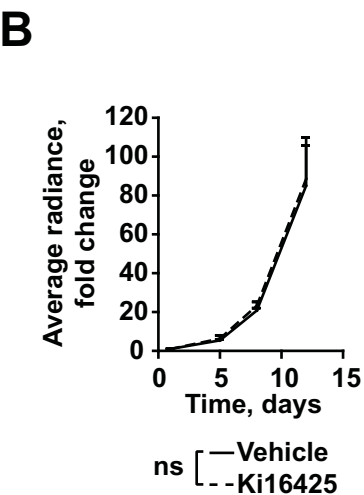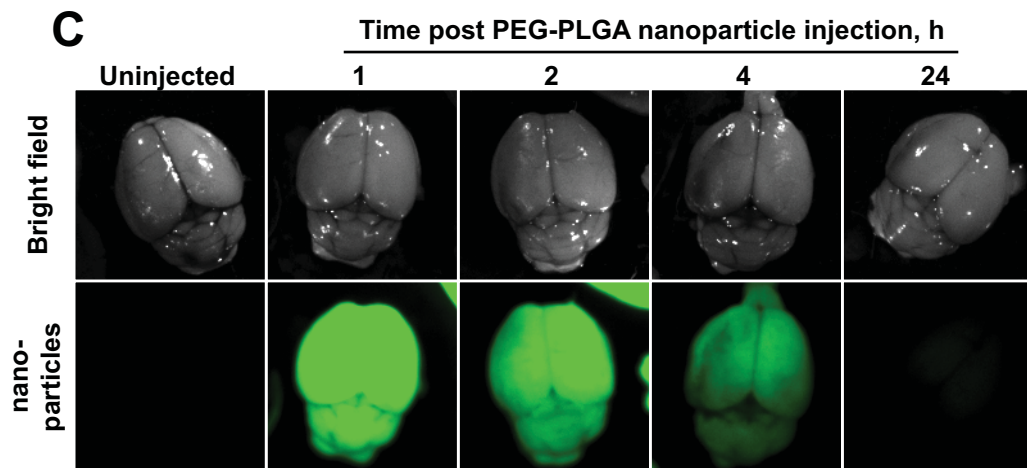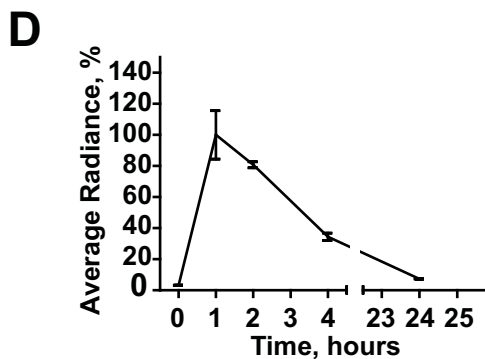

**Administration of Ki16425 has no effect on intracranial tumor growth.**

**A.** Representative images of GBM12 growing in brains of mice treated with Vehicle-control or Ki16425. **B.** Quantification of bioluminescence, as in **A**; two-way ANOVA, Tukey post hoc test;  $n = 5$ . **C.** Representative images of mice brains injected with PEG-PLGA nanoparticles loaded with fluorescent dye. **D.** Quantification of fluorescence from brains as in **C**;  $n=2$ .

| target                  | cat.#      | host species | company                  | application | dilution      |
|-------------------------|------------|--------------|--------------------------|-------------|---------------|
| acetyated alpha tubulin | T6793      | mouse        | Sigma                    | IF, F-IHC   | 1:1000        |
| acetyated alpha tubulin | 5335S      | rabbit       | Cell Signaling           | IF          | 1:500         |
| gamma tubulin           | sc-7396    | goat         | Santa Cruz               | IF, F-IHC   | 1:500         |
| IFT88                   | 60227-1-Ig | mouse        | Proteintech              | WB          | 1:1000        |
| Kif3B                   | sc-50456   | rabbit       | Santa Cruz               | WB          | 1:500         |
| alpha tubulin           | 16199      | mouse        | Sigma                    | WB          | 1:40000       |
| pERK1/2<br>T202/204     | 9101       | rabbit       | Cell Signaling           | IF, WB      | 1:200, 1:1000 |
| ERK1/2                  | 4695       | rabbit       | Cell Signaling           | WB          | 1:1000        |
| GAPDH                   | MAB374     | mouse        | Millipore                | WB          | 1:80000       |
| pAKT S473               | AF887      | rabbit       | R&D Systems              | IF, WB      | 1:100, 1:500  |
| AKT                     | 2920       | mouse        | Cell Signaling           | WB          | 1:1000        |
| FLAG                    | F1804      | mouse        | Sigma                    | IF, WB      | 1:500, 1:1000 |
| FLAG                    | PA1-984B   | rabbit       | Thermo Fisher Scientific | IF, WB      | 1:500, 1:1000 |
| G alpha s               | sc-135914  | mouse        | Santa Cruz               | IF, WB      | 1:100, 1:500  |
| G alpha q               | sc-393     | rabbit       | Santa Cruz               | IF, WB      | 1:200, 1:1000 |
| G alpha 12              | sc-409     | rabbit       | Santa Cruz               | IF, WB      | 1:100, 1:200  |
| G alpha i1              | sc-391     | rabbit       | Santa Cruz               | IF, WB      | 1:100, 1:500  |
| Arl13b                  | 17711-1-AP | rabbit       | Proteintech              | IF, F-IHC   | 1:400, 1:200  |
| LPAR1                   | 20442-1-AP | rabbit       | Proteintech              | IF          | 1:100         |
| LPAR1                   | 10005280   | rabbit       | Cyman chemicals          | WB          | 1:250         |
| LPAR1                   | sc-515665  | mouse        | Santa Cruz               | IF          | 1:100         |

Supplementary table 1

| <b>name</b> | <b>clone ID</b> | <b>targeting sequence</b> | <b>vector</b> | <b>company</b> |
|-------------|-----------------|---------------------------|---------------|----------------|
| shIFT88#1   | V3LHS_338157    | GGAATAACACTGACCACCT       | pGIPZ         | Dharmacon      |
| shIFT88#2   | V3LHS_338155    | AGCATCTGAATACTGACCA       | pGIPZ         | Dharmacon      |
| shKif3B#1   | V3LHS_644788    | TTGCTAGTCTCTTCTCTCA       | pGIPZ         | Dharmacon      |
| shKif3B#2   | V3LHS_635533    | ATTCATCTTCATCCTGCA        | pGIPZ         | Dharmacon      |

Supplementary table 2

| <b>name</b>                       | <b>sequence</b>                                                                                                                                                                                                                                                    | <b>company</b>   |
|-----------------------------------|--------------------------------------------------------------------------------------------------------------------------------------------------------------------------------------------------------------------------------------------------------------------|------------------|
| BamHI-LPAR1                       | ATTGGATCCATGGCTGCCATCTCTACTTCC                                                                                                                                                                                                                                     | IDT Technologies |
| LPAR1-TGA-XhoI                    | ATTCTCGAGTCAAACCACAGAGTGGTCATTGC                                                                                                                                                                                                                                   | Invitrogen       |
| BamHI-LPAR3                       | ATTGGATCCATGAATGAGTGTCACTATGACAAGC                                                                                                                                                                                                                                 | IDT Technologies |
| LPAR3-TGA-XhoI                    | ATTCTCGAGTCAGGAAGTGCTTTTATTGCAGACTG                                                                                                                                                                                                                                | Invitrogen       |
| BamHI-LPAR6                       | ATTGGATCCATGGTAAGCGTTAACAGCTCC                                                                                                                                                                                                                                     | IDT Technologies |
| LPAR6-TGA-XhoI                    | ATTCTCGAGTCAGGCAGCAGATTCAATTGTCAAATATC                                                                                                                                                                                                                             | Invitrogen       |
| ER-3xFlag-MSC<br>(forward strand) | GATCCTAAGCTTACCGGTATGAAGACGATCATCGCCCTGAGCT<br>ACATCTTCTGCCTGGTATTCGCCATGGACTACAAAGACCATGAC<br>GGTGATTATAAAGATCATGACATCGATTACAAGGATGACGATGA<br>CAAGGGAGGTGGAGGCGGTGGAGGATCCTGTACAGCTAGCGA<br>ATTCTGCAGATATCGGCGCGCGTTTAAACACGCGTCTCGAGT<br>GATTAATTAAGGTCGACGATCCT | Invitrogen       |
| sgLPAR1_F                         | caccgTCTTTGGCTATGTTTCGCCAG                                                                                                                                                                                                                                         | Invitrogen       |
| sgLPAR1_R                         | aaacCTGGCGAACATAGCCAAAGAc                                                                                                                                                                                                                                          | Invitrogen       |

Supplementary table 3
